1 Butyryl/Caproyl-CoA:Acetate CoA-Transferase: Cloning, Expression and Characterization of the  
2 Key Enzyme Involved in Medium-Chain Fatty Acid Biosynthesis

3 Qingzhuoma Yang<sup>a,b</sup>, Shengtao Guo<sup>b,c</sup>, Qi Lu<sup>a,b</sup>, Yong Tao<sup>a,d,#</sup>, Decong Zheng<sup>a,b</sup>, Qinmao Zhou<sup>a,b</sup>,  
4 Jun Liu<sup>d</sup>

5  
6 <sup>a</sup> Key Laboratory of Environmental and Applied Microbiology, Environmental Microbiology Key  
7 Laboratory of Sichuan Province, Chengdu Institute of Biology, Chinese Academy of Science,  
8 Chengdu 610041, China

9 <sup>b</sup> University of Chinese Academy of Sciences, Beijing 100049, China

10 <sup>c</sup> BGI Education Center, University of Chinese Academy of Sciences, Shenzhen 518083, China

11 <sup>d</sup> Faculty of Bioengineering, Sichuan University of Science & Engineering, Xueyuan Street 180<sup>#</sup>,  
12 Huixing Rd. 643000, Zigong, P.R. China

13

14 <sup>#</sup> To whom correspondence should be addressed. Email: taoyong@cib.ac.cn.

15 **Running title:** Caproyl-CoA:Acetate CoA-Transferase

16 **Keywords:** CoA-transferase, chain elongation, Medium-chain Fatty Acids, *Ruminococcaceae*  
17 bacterium, Caproic acid

18

19

20 **Abstract**

21 Coenzyme A transferases (CoATs) are important enzymes involved in carbon chain elongation  
22 contributing to medium-chain fatty acid (MCFA) biosynthesis. For example, butyryl-CoA:acetate  
23 CoA transferase (BCoAT) is responsible for the final step of butyrate synthesis from butyryl-CoA.  
24 However, little is known about caproyl-CoA:acetate CoA-transferase (CCoAT), which is  
25 responsible for the final step of caproate synthesis from caproyl-CoA. In this study, two CoAT  
26 genes from *Ruminococcaceae* bacterium CPB6 and *Clostridium tyrobutyricum* BEY8 were  
27 identified by gene cloning and expression analysis. The enzyme assays and kinetic studies were  
28 carried out using butyryl-CoA or caproyl-CoA as the substrate. CPB6-CoAT can catalyze the  
29 conversion of both butyryl-CoA to butyrate and caproyl-CoA to caproate, but its catalytic efficiency  
30 with caproyl-CoA as the substrate was 3.8 times higher than that with butyryl-CoA. In contrast,  
31 BEY8-CoAT had only BCoAT activity, not CCoAT activity. This demonstrated the existence of a  
32 specific CCoAT involved in chain elongation via the reverse  $\beta$ -oxidation pathway. Comparative  
33 bioinformatics analysis showed the presence of a highly conserved motif (GGQXDFXXGAXX) in  
34 CoATs, which is predicted to be the active center of CoATs. Single point mutations in the conserved  
35 motif of CPB6-CoAT (Asp346 and Ala351) led to marked decreases in the activity for butyryl-CoA  
36 and caproyl-CoA, indicating that the conserved motif is the active center of CPB6-CoAT, and sites  
37 Asp346 and Ala351 were critical residues that affect enzymatic activity. This work provides insight  
38 into the function of CCoAT in caproic acid biosynthesis and improves the understanding of the  
39 chain elongation pathway for MCFA production.

40

## 41 **Introduction**

42 Medium-chain fatty acids (MCFAs, C6-C12) are widely utilized in agriculture and industry. For  
43 example, *n*-caproic acid (C6) is used as a precursor for the production of fragrances (1),  
44 antimicrobial agents (2), and drop-in biofuels (3). Recent studies have shown that MCFAs produced  
45 from renewable feedstock by anaerobic fermentation hold promise for replacing fossil resources  
46 and botanical oils such as palm kernel oil to meet the requirements for sustainable development (4).  
47 A few microorganisms, such as *Megasphaera elsdenii* (5), *Ruminococcaceae* bacterium CPB6 (6),  
48 *Acinetobacter* spp. (7), and *Clostridium kluyveri* (8), have been reported to be able to synthesize  
49 MCFAs from renewable feedstock via the carbon chain elongation pathway (9). In the process of  
50 chain elongation, intermediates of acidogenesis, such as acetate (C2) and *n*-butyrate (C4), as  
51 substrates are elongated to caproic acid (C6) and octanoic acid (C8) by adding acetyl-CoA in  
52 reverse  $\beta$ -oxidation cycles (10,11). C2 or C4, transformed to acetyl-CoA or butyryl-CoA,  
53 respectively, represents the initial substrate for elongation in reverse  $\beta$ -oxidation. The pathway has  
54 been identified as a key metabolic process in MCFA biosynthesis (12).

55 The production of high concentrations of butyrate (>10 mM) in vitro has been reported in some  
56 anaerobes, such as *Roseburia* (13) and *Faecalibacterium* (14). Butyrate is normally generated from  
57 two molecules of acetyl-CoA, yielding acetoacetyl-CoA, which is then converted to butyryl-CoA  
58 (15). In the latter reaction, butyryl-CoA is exchanged with exogenously derived acetate to yield  
59 acetyl-CoA and butyrate (16). The enzymes responsible for butyrate production in the reverse  $\beta$ -  
60 oxidation pathway comprise acetyl-CoA acetyltransferase (AtoB), 3-hydroxybutyryl-CoA  
61 dehydrogenase (Hbd), enoyl-CoA hydratase (Crt), butyryl-CoA dehydrogenase (Bcd), and butyryl-  
62 CoA:acetate CoA-transferase (BCoAT) (17). Among them, BCoAT is a well-known CoA-  
63 transferase (CoAT) responsible for the final step of butyric acid synthesis, transforming the CoA  
64 moiety from butyryl-CoA to an exogenous acetate molecule, which results in the formation of  
65 butyrate and acetyl-CoA (18,19). CoATs are abundant in anaerobic fermenting bacteria that cope

66 with low ATP yields, but they are also found in aerobic bacteria and in the mitochondria of humans  
67 and other mammals (20). The synthesis pathway and key genes associated with butyric acid in  
68 MCFA biosynthesis via reverse  $\beta$ -oxidation are well understood. However, little is known about  
69 key genes involved in the conversion of butyric acid (C4) to caproic acid (C6). Although most  
70 genes responsible for butyric acid production are suggested to function in further chain elongation  
71 of MCFAs (17), the fact that many butyrate-producing bacteria, such as *Clostridium tyrobutyricum*,  
72 produce only butyric acid instead of caproic acid via the reverse  $\beta$ -oxidation pathway suggests that  
73 there may be different functional genes involved in the production of caproic acid.

74 Recently, our study showed that *Ruminococcaceae* bacterium CPB6 is a caproic acid-producing  
75 bacterium with the highly prolific ability to perform chain elongation and can produce caproic acid  
76 (C6) from lactate (as an electron donor) with C2-C4 carboxylic acids and heptic acid (C7) with  
77 C3-C5 carboxylic acids as electron acceptors (EAs) (21,22). Moreover, a set of genes correlated  
78 with chain elongation were identified by sequencing and annotating the whole genome of the CPB6  
79 strain (23). However, very little information is available on enzymes involved in the conversion of  
80 C4 to C6, especially the gene responsible for the conversion of caproyl-CoA to caproic acid.

81 In this study, we cloned a predicted CCoAT gene from the caproic acid-producing strain CPB6 (21)  
82 and a BCoAT gene from the butyric acid-producing *C. tyrobutyricum* BEY8 (24) and expressed the  
83 two proteins in *Escherichia coli* BL21 (DE3) with the plasmid pET28a. The aims of this study were  
84 to (i) compare differences in sequence, structure, enzymatic activity and substrate specificity  
85 between the CCoAT and BCoAT; (ii) identify the active center of the CCoAT and its effects on the  
86 activities of enzymes with different structures; and (iii) verify the existence of the CCoAT in the  
87 caproic acid biosynthesis pathway.

88

## 89 **Results and Discussion**

### 90 **Cloning, expression, and purification of CoA-transferase**

91 According to the genome sequences of strains CPB6 and *C. tyrobutyricum* BEY8, specific primers  
92 targeting CoAT genes were designed and synthesized (Table 1). Agarose gel electrophoresis  
93 showed that the size of the PCR products and the double-digestion products was approximately  
94 1300 bp, consistent with the expected sizes of CPB6-CoAT (1344 bp) (Fig. S1) and the BEY8-  
95 CoAT gene (1233 bp) (Fig. S2). Sequence analysis of the recombinant CoAT plasmids showed that  
96 the cloned genes shared 100% similarity with the predicted CoAT genes of strains CPB6 (CCoAT)  
97 and BEY8 (BCoAT). This finding indicated that the recombinant *E. coli*/pET28a-CCoAT and *E.*  
98 *coli*/pET28a-BCoAT were successfully constructed.

99 To characterize the functions of CoAT proteins, the two recombinant plasmids (pET28a-CCoAT  
100 and pET28a-BCoAT) were expressed in *E. coli* BL21 (DE3). Single bands of the purified proteins  
101 were detected on SDS-polyacrylamide gels after affinity chromatography (Fig. 1A). As shown in  
102 Fig. 1A, there was no obvious protein band of approximately the size of the target protein in *E.*  
103 *coli*/pET28a (control), while a single band was observed in *E. coli*/pET28a-BCoAT (lane 2) and *E.*  
104 *coli*/pET28a-CCoAT (lane 3), and their sizes were consistent with the expected sizes of BEY8-  
105 CoAT (46 kDa) and CPB6-CoAT (49 kDa). Furthermore, western blotting analysis with a His-  
106 antibody (Fig. 1B) also demonstrated that the observed bands were consistent with the expected  
107 molecular mass of BEY8-CoAT and CPB6-CoAT (approximately 46-49 kDa).

108

### 109 **Enzyme assay**

110 The CoAT activity of crude enzyme extracts was determined by measuring the production of acetyl-  
111 CoA from butyryl-CoA or caproyl-CoA (25). It has been previously reported that the key reactions

112 for butyrate and caproate production were (1) butyryl-CoA + acetate → butyrate + acetyl-CoA and  
113 (2) caproyl-CoA + acetate → caproate + acetyl-CoA (10,21,26). As shown in Table 2, the crude and  
114 purified BEY8-CoAT activities with butyryl-CoA and sodium acetate as substrates were  $6.91 \pm 0.12$   
115 and  $26.2 \pm 0.09$  U/mg of protein, respectively. However, this enzyme showed no activity for caproyl-  
116 CoA. This result suggested that BEY8-CoAT is a BCoAT, similar to the CoAT from *Clostridium*  
117 *acetobutylicum* ATCC 824 that is able to produce butyrate instead of caproate, and its purified  
118 enzyme activity was 29.1 U/mg of protein (27). Moreover, the butyrate-producing bacterium  
119 *Coprococcus* sp. strain L2-50 from the human large intestine showed very high BCoAT activity  
120 ( $118.39 \pm 5.02$  U/mg of protein) but no CCoAT activity (13). This result indicated that the BCoAT  
121 probably has substrate specificity for butyryl-CoA (29). In contrast, the activities of crude and  
122 purified CPB6-CoAT with butyryl-CoA and sodium acetate as substrates were  $2.07 \pm 0.06$  and  $10.8$   
123  $\pm 0.02$  U/mg of protein, and the activities with caproyl-CoA and sodium acetate as substrates were  
124  $5.11 \pm 0.08$  and  $27.6 \pm 0.15$  U/mg of protein, respectively (Table 2), indicating that CPB6-CoAT can  
125 catalyze the conversion of both butyryl-CoA to butyrate and caproyl-CoA to caproate. It is worth  
126 noting that the crude and purified CPB6-CoAT activity for caproyl-CoA was 2.5-2.6 times higher  
127 ( $5.11$  vs  $2.07$ ,  $27.56$  vs  $10.28$  U/mg of protein) than that for butyryl-CoA, suggesting that CPB6-  
128 CoAT specifically prefers caproyl-CoA as a substrate instead of butyryl-CoA.

129 The BCoAT is required for butyrate biosynthesis in *Clostridium kluyveri* (13) and *C. tyrobutyricum*  
130 (28). This enzyme is responsible for the final step of butyrate production, catalyzing the conversion  
131 of butyryl-CoA and acetate to butyrate and releasing acetyl-CoA (16). As reported in previous  
132 studies, this enzyme is considered to be a biomarker for identifying butyrate-producing bacteria  
133 (16,27,29). However, BCoAT is not responsible for chain elongation of larger or higher-carbon-  
134 numbered (>C5) fatty acids (28). Seedorf et al.(17) speculated that BCoAT may catalyze the  
135 conversion of caproyl-CoA to caproate, similar to the conversion of butyryl-CoA to butyrate, based

136 on genome analysis of *C. kluyveri*, but no further research has been reported. Our previous study  
137 showed that the rate of caproate production with caproyl-CoA as the substrate in strain CPB6 was  
138 3.5 times higher than that observed with butyryl-CoA as the substrate and suggested the existence  
139 of a CCoAT that specifically prefers caproyl-CoA instead of butyryl-CoA as the substrate (21). In  
140 this study, CPB6-CoAT was confirmed for the first time to be a CCoAT responsible for the final  
141 step of caproate formation, although it harbored low BCoAT activity for butyryl-CoA. These data  
142 demonstrated the existence of a specific CCoAT involved in the chain elongation of MCFAs, which  
143 is significantly different from the function of BCoAT. The detailed mechanism underlying this  
144 functional difference needs to be further studied.

145

#### 146 **Kinetics of CoA-transferases**

147 The kinetic parameters of the recombinant proteins were investigated using a colorimetric assay  
148 according to a previous study (16). Initial velocities were determined at fixed sodium acetate  
149 concentrations with different butyryl-CoA or caproyl-CoA concentrations.  $K_m$  and  $V_m$  values were  
150 estimated from secondary plots (Materials and Methods). Additionally,  $k_{cat}$  values were calculated  
151 from enzyme concentrations in the reaction mixtures. The double-reciprocal plotting of enzyme  
152 kinetics showed that the reactions of the two CoATs follow the ternary-complex mechanism (Fig.  
153 S3), the result suggested that the CoATs of the CBP6 and BEY8 probably belong to family III,  
154 which can be distinguished kinetically(18).

155 As  $k_{cat}/K_m$  can be used to compare the catalytic efficiency of different substrates catalyzed by the  
156 same enzyme (30), a lower  $K_m$  value indicates that the enzyme has a higher affinity for the substrate  
157 and vice versa (31). In this study, the  $K_m$ ,  $k_{cat}$ ,  $k_{cat}/K_m$  and  $V_m$  values of CPB6-CoAT with caproyl-  
158 CoA were 358.8  $\mu\text{M}$ , 14.74  $\text{min}^{-1}$ , 41.08  $\text{mM}^{-1}\text{min}^{-1}$  and 29.51  $\mu\text{M min}^{-1}$ , respectively, and those  
159 with butyryl-CoA were 536.9  $\mu\text{M}$ , 5.810  $\text{min}^{-1}$ , 10.82  $\text{mM}^{-1}\text{min}^{-1}$  and 11.62  $\mu\text{M min}^{-1}$ , respectively

160 (Table 3). The catalytic efficiency of CPB6-CoAT for caproyl-CoA was 3.8 times (41.08 vs 10.82  
161  $\text{mM}^{-1}\text{min}^{-1}$ ) higher than that for butyryl-CoA, consistent with our previous result showing that the  
162 CCoAT activity is predominantly higher than the BCoAT activity (21). The  $K_m$  of CPB6-CoAT for  
163 caproyl-CoA was significantly lower than that for butyryl-CoA (358.8 vs 536.9  $\mu\text{M}$ ), exhibiting the  
164 higher affinity of this enzyme for caproyl-CoA relative to butyryl-CoA. These results also partly  
165 explained why caproate instead of butyrate is always the predominant product in the fermentation  
166 broth of strain CPB6 (22,23). BEY8-CoAT had only BCoAT activity, with  $K_m$ ,  $k_{cat}$ ,  $k_{cat}/K_m$  and  $V_m$   
167 values of 369.5  $\mu\text{M}$ , 13.91  $\text{min}^{-1}$ , 37.65  $\text{mM}^{-1}\text{min}^{-1}$  and 27.81  $\mu\text{M min}^{-1}$ , respectively, and there  
168 was no detectable CCoAT activity (Tables 2 and 3), supporting our previous results showing that  
169 strain BEY8 produces only butyric acid as the predominant product (24). Similar to the results of  
170 Lee et al., the CoAT from *C. tyrobutyricum* only catalyzes the conversion of butyryl-CoA to  
171 butyrate and is not responsible for chain elongation of larger or higher-carbon-numbered ( $>\text{C}5$ )  
172 fatty acids (29).

173 The  $K_m$  of BEY8-CoAT for butyryl-CoA (369.5  $\mu\text{M}$ ) was obviously greater than that of CPB6-  
174 CoAT (536.9  $\mu\text{M}$ ), indicating that BEY8-CoAT had higher enzymatic affinity for butyryl-CoA than  
175 CPB6-CoAT. Similarly, CoAT (PGN\_0725) from *Porphyromonas gingivalis* (15,16) and CoAT  
176 from *C. acetobutylicum* ATCC 824 (27) both catalyze the conversion of butyryl-CoA to butyrate,  
177 with  $K_m$  values of 520  $\mu\text{M}$  and 21.01  $\mu\text{M}$ , respectively. This indicated that the BCoAT generally  
178 had higher affinity and catalytic activity for butyryl-CoA than the CCoAT, while no BCoAT from  
179 butyric acid-bacteria displayed affinity and catalytic activity for caproyl-CoA. These results  
180 suggested that the BCoAT is only involved in chain elongation of C2 to C4, not in that of C4 to C6  
181 or C8.

182

183 **Phylogenetics of the whole genome and multiple amino acid sequence alignment**



184 The whole-genome phylogenetic tree was constructed based on 119 single-copy genes (including  
185 CoATs) that were common among 29 strains (Fig. 2). These strains have a wide range of butyrate  
186 metabolic pathways (29), for example, *Roseburia* sp., *Faecalibacterium prausnitzii*, and  
187 *Coprococcus* sp. from the human gut exhibit BCoAT activity values of 38.95, 18.64 and 118.39  
188 U/mg of protein (crude extracts), respectively (13). The two species closest to strain CPB6 were  
189 *Pygmaibacter massiliensis* (32) and *F. prausnitzii* (33), which are also butyric acid-producing  
190 bacteria in human feces. Interestingly, the species closest to *C. tyrobutyricum* BEY8 was *C. kluyveri*,  
191 which is a well-known caproic acid-producing bacterium. This close relationship may be because  
192 they belong to the same genus, *Clostridium*.

193 Based on the alignment results generated from CoAT protein sequences from six different species,  
194 14 amino acids (GXGGQXDFXXGAXX, position 340-353) of the CoATs in all the microbes were  
195 highly conserved (except in *M. elsdenii*), and their secondary structures consisted of 17  $\alpha$ -helices  
196 and 21  $\beta$ -sheets (Fig. 3). The sequence similarities between CPB6-CoAT and the analyzed CoATs  
197 were as follows: *C. kluyveri* (37.67%), *M. elsdenii* (10.27%), *C. tyrobutyricum* BEY8 (38.04%),  
198 *Lachnospiraceae* bacterium (60.59%), and *Anaerostipes hadrus* (58.52%). Among the six bacteria,  
199 strain CPB6, *C. kluyveri*, and *M. elsdenii* are caproic acid-producing bacteria, while *C.*  
200 *tyrobutyricum* BEY8, *Lachnospiraceae* bacterium, and *A. hadrus* are butyric acid-producing  
201 bacteria. The alignment results showed that CPB6-CoAT shared lower similarity (10.27-37.67%)  
202 with the CoATs of *C. kluyveri* and *M. elsdenii* but higher similarity (58.52-60.59%) with the CoATs  
203 of *Lachnospiraceae* bacterium and *A. hadrus*. This may be because strain CPB6 belongs to the  
204 family *Ruminococcaceae*, which is closer to *Lachnospiraceae* and *Anaerostipes* at the taxonomic  
205 phylogeny level than *Megasphaera* and *Clostridium*.

206

207 **Prediction and comparison of the three-dimensional (3D) structure and active site**

208 As shown in Fig. 4A, the three-dimensional (3D) structure of CPB6-CoAT has one subunit which  
209 may consist of two main domains resulting in a characteristic two-domain fold in a homo-tetrameric  
210 structure. A comparison of the 3D structures of the six CoAT proteins (Fig. 4) showed that these  
211 CoATs shared similar conformations of the structural elements ( $\alpha$ -helices and  $\beta$ -strands) with slight  
212 structural modifications in the loop regions and active centers, with the exception of the CoAT from  
213 *M. elsdenii* (Fig. 4C). The 3D structure of the *M. elsdenii* protein was obviously different from that  
214 of other CoATs, and the divergences were located not only in the structural elements of  $\alpha$ -helices  
215 and  $\beta$ -strands but also in the loops. This may be attributed to the distant genetic relationship  
216 between *M. elsdenii* and the other five bacteria. Although *M. elsdenii* produces caproic acid via  
217 acetyl-CoA and succinate (34), the functions of the CoATs may differ between strain CPB6 and *M.*  
218 *elsdenii*. The 3D structures of CoATs among *C. tyrobutyricum* BEY8, *Lachnospiraceae* bacterium,  
219 and *A. hadrus* shared almost the same conformation of  $\alpha$ -helices and  $\beta$ -strands except for some  
220 slight variation in the loops (Fig. 4D–F). The protein structure and active center structures between  
221 CPB6-CoAT and BEY8-CoAT were further compared, as shown in Fig. S4, and both showed  
222 similar 3D structures except for the location and structure of the active center. The predicted active  
223 sites of the six CoATs are shown in Table 4. The predicted active center of the CPB6-CoAT protein  
224 was located between amino acids 342 and 353 (GGQLDFVLGAYL) while the active center of the  
225 BEY8-CoAT protein (GGQIDFTRGASM) was located from amino acids 335 to 346, and both  
226 active site peptides contain a phenylalanine and tyrosine (Fig. S4).

227 The structure of proteins plays an important role in their functional properties and catalytic  
228 efficiency (35); for example, succinyl CoA:3-ketoate CoA transferase from pig heart (36) and 4-  
229 hydroxybutyrate CoA-transferase from *Clostridium aminobutyricum* (37) showed unexpected  
230 changes in protein modification and specific activity when their crystal structures changed. In this  
231 study, a comparison of the 3D and active center structures showed the similarities and differences  
232 between CPB6-CoAT and other CoATs (Fig. 4 and S4), which may have affected the enzyme

233 catalytic function and activity. On the basis of these results, it is of great significance to study the  
234 functional differences caused by the structural changes in CoATs. The exact structure and function  
235 of the active center of the CPB6-CoAT protein remains to be determined through subsequent  
236 comprehensive experiments and analysis.

237

### 238 **Site-directed mutagenesis**

239 Site-directed mutagenesis was used to verify the active sites of the protein (38). According to the  
240 predicted active center of CPB6-CoAT (GGQLDFVLGAYL, 342-353 aa), site-directed  
241 mutagenesis targeting sites Asp346 and Ala351 was carried out to identify the effects of the two  
242 residues on the catalytic activity of CPB6-CoAT. Specifically, Asp346 was replaced by His and  
243 Ala351 was replaced by Pro via site-directed mutagenesis. The nucleotide substitutions were  
244 confirmed by Sanger sequencing of the DNA (Fig. S5). Enzyme assays showed that compared to  
245 wild-type CPB6-CoAT, the Asp346 substitution led to an approximately 76% loss of BCoAT  
246 activity and 72% loss of CCoAT activity, while the Ala351 substitution resulted in an almost 50%  
247 loss of BCoAT activity and 55% loss of CCoAT activity (Fig. 5). Moreover, as shown in Table 3,  
248 the  $k_{cat}/K_m$  values for butyryl-CoA and caproyl-CoA of the D346H mutant (1.734 and 5.663  
249  $\text{mM}^{-1}\text{min}^{-1}$ ) and A351P mutant (4.797 and 12.75  $\text{mM}^{-1}\text{min}^{-1}$ ) were all lower than those of wild-  
250 type CPB6-CoAT (10.82 and 41.08  $\text{mM}^{-1}\text{min}^{-1}$ ). This result indicated that the Asp346 and Ala351  
251 residues play vital roles in the active center of CPB6-CoAT.

252 Notably, the exchange of Asp, an acidic amino acid, for His led to loss of a carboxy group and the  
253 introduction of two amidogens. Similarly, the replacement of Ala with Pro led to loss of an  
254 amidogen and the introduction of a carboxy group. Ala lacked a bulky side chain and therefore  
255 would likely not have any steric and electrostatic effects, and this change would not destroy the  
256 conformation of the main chain (39). Differences in structures and properties among the sequences

257 may be the reason for the differences in CoAT activity (40). These results demonstrated that the  
258 conserved motif (GGQLDFVLGAYL, 342-353 aa) of CPB6-CoAT is directly linked to enzymatic  
259 activity. In conclusion, the conserved motif was the catalytic center of CPB6-CoAT, within which  
260 the Asp346 and Ala351 residues were essential for CoAT activity. These findings provide  
261 significant information for further detailed research on the structures and functions of CPB6-CoAT.

262

263 **Concluding remarks.** In our present study, two CoA-transferase genes were identified by cloning  
264 and expression in *E. coli* BL21 (DE3) with the plasmid pET28a. CPB6-CoAT showed higher  
265 activity for caproyl-CoA than for butyryl-CoA, while BEY8-CoAT only had activity for butyryl-  
266 CoA. This result indicated that CPB6-CoAT is responsible for the final step of caproic acid  
267 production. The bioinformatics analysis revealed differences between CPB6-CoAT and other  
268 CoATs. Moreover, site-directed mutagenesis analysis demonstrated that the conserved motif  
269 (GGQLDFVLGAYL, 342-353 aa) was probably the active center of CPB6-CoAT, within which  
270 sites Asp346 and Ala351 residues were identified as critical residues that affect the enzymatic  
271 activity of CPB6-CoAT. These results confirmed the existence of a CCoAT involved in the  
272 production of caproic acid, and the enzyme is apparently different from the BCoAT responsible for  
273 the production of butyric acid. This study facilitates our understanding of the metabolism for chain  
274 elongation via the reverse  $\beta$ -oxidation pathway. However, the detailed CCoAT structure and its  
275 function in MCFA biosynthesis require further study through crystallization of proteins and X-ray  
276 crystal structure analysis.

277

278 **Experimental Procedures**

279 **Strain growth conditions**

280 *E. coli* DH5 $\alpha$  (TsingKe, Chengdu, China) and *E. coli* BL21 (DE3) (Transgene, Beijing, China) were  
281 cultured in Luria broth (LB) medium supplemented with 50  $\mu$ g/ml kanamycin (Sangon Biotech,  
282 Shanghai, China) at 37 °C. *Ruminococcaceae* bacterium CPB6 was grown anaerobically at 37 °C  
283 in modified reinforced Clostridium medium (Binder, Qingdao, China) (20). *C. tyrobutyricum* BEY8  
284 was grown anaerobically at 37 °C in TGY medium (30 g/L tryptone, 20 g/L glucose, 10 g/L yeast  
285 extract, and 1 g/L L-cysteine hydrochloric acid; pH 7.0).

286

287 **Gene cloning and plasmid construction**

288 The CoAT genes were amplified from the genomic DNA of *Ruminococcaceae* bacterium CPB6  
289 (23) or *C. tyrobutyricum* BEY8 (24) through PCR using the primers listed in Table 1. During  
290 amplification, the following conditions were used: initial denaturation (5 min at 98 °C), followed  
291 by 30 cycles of denaturation (10 s at 98 °C), annealing (30 s at 52 °C), and elongation (1 min at  
292 72 °C) and a final extension (5 min at 72 °C). The PCR products were verified by agarose  
293 electrophoresis, recovered using a PCR purification kit (Fuji, Chengdu, China), and seamlessly  
294 inserted into the plasmid pET28a double digested with *Not* I and *Sal* I (Thermo, Waltham, USA) to  
295 construct the recombinant plasmid by using a seamless cloning kit (Biomed, Beijing, China). The  
296 recombinant plasmids were verified by Sanger sequencing and then transformed into *E. coli* BL21  
297 (DE3) cells.

298

299 **Expression and purification of the CoA-transferases**

300 The recombinant plasmids pET28-CoAT-CPB6 (pET28-CCoAT) and pET28-CoAT-BEY8

301 (pET28-BCoAT) were transformed into *E. coli* BL21 (DE3). The transformed cells were cultured  
302 in LB medium containing 50 µg/ml kanamycin at 37 °C until the OD<sub>600</sub> reached 0.5 and then further  
303 cultured at 22 °C for 12 h with 0.4 mM IPTG. The cultured cells were harvested by centrifugation  
304 (8,000 × *g*, 10 min) at 4 °C, and the cell pellet was resuspended in 50 mM potassium phosphate  
305 (pH 8.0). The cells were then disrupted by an ultrasonicator (Huxi, Shanghai, China) for 30 min  
306 (200 W, 4 s, interval 6 s) and centrifuged at 8,000 × *g* for 30 min to remove the insoluble material.  
307 Then, the enzyme was purified with Ni-NTA Sepharose (Genscript, Nanjing, China) and eluted  
308 with 50 mM sodium phosphate (pH 8.0) containing 300 mM NaCl and 250 mM imidazole. Finally,  
309 the purity and MW of the enzyme were assessed using SDS-PAGE analysis. Moreover, the enzyme  
310 was analyzed by western blotting with anti-6×His rabbit polyclonal antibody (Sangon Biotech,  
311 Shanghai, China). The protein concentrations were determined using a BCA protein assay kit  
312 (Solarbio, Beijing, China).

313

#### 314 **Enzymatic characterization**

315 CoAT activity in crude enzyme extracts and of purified recombinant proteins was measured by  
316 determining the concentration of acetyl-CoA, a reaction byproduct, with the citrate synthase assay  
317 as described in previous studies with minor modifications (25,41). In brief, the reaction was  
318 initiated by the addition of enzyme (up to 20 ng/ml) and was performed in a total volume of 1.0 ml  
319 at 25 °C: 100 mM potassium phosphate buffer (pH 7.0), 200 mM sodium acetate, 1.0 mM 5,5'-  
320 dithiobis (2-nitrobenzoate), 1.0 mM oxaloacetate, 8.4 *n*kat citrate synthase (Sigma, St. Louis, USA),  
321 0.5 mM CoA derivatives (Sigma, St. Louis, USA). The released CoA, corresponding to the residual  
322 amount of acetyl-CoA, was detected by measuring the absorbance at 412 nm. One unit of activity  
323 is defined as the amount of enzyme which converts 1 µmol of acetyl-CoA per min under these  
324 conditions.

325 The kinetic parameters of the recombinant protein were also calculated by using the coupled  
326 spectrophotometric enzyme assay through citrate synthesis (16). The reaction mixture was the same  
327 as that mentioned above, and the concentrations of butyryl-CoA or caproyl-CoA were varied from  
328 0.5 to 5 mM. The kinetic parameters were computed by using the Lineweaver–Burk transformation  
329 of the Michaelis-Menten equation, in which velocity is a function of the substrate (42,43). The  
330 catalytic constant ( $k_{cat}$ ) was defined as the number of CoAT molecules formed by one molecule of  
331 enzyme in a single second. All measurements were performed in triplicate for biological  
332 replications.

333

### 334 **Bioinformatics**

335 Sequence alignment was performed using ESPript (44). Representative CoAT (8,45-47) sequences  
336 were downloaded from the NCBI database. MEGA-X software was used to perform sequence  
337 alignment and construct the phylogenetic tree (48). The active sites of CoATs were predicted by  
338 the online tool ScanProsite, and the three-dimensional CoAT structure was simulated by NCBI-  
339 CDD to search for templates in SWISS-MODEL and was embellished and labeled by PyMOL 2.3.3  
340 software (49,50). The phylogenetic relationships of CoATs from different species were obtained by  
341 using OrthoFinder, the amino acid sequences were downloaded from the NCBI website (version  
342 2.2.7) (51), and MUSCLE (v3.8.31) was used to calibrate the 119 shared single-copy genes (52).  
343 The phylogenomic tree was derived from a supermatrix comprising these shared single-copy genes  
344 with 41,213 unambiguously aligned amino acids using the maximum likelihood (43) method in  
345 RAXML (v8.2.10) (53) under the PROTGAMMAAUTO model, with 100 bootstrap replicates.

346

### 347 **Site-directed mutagenesis**

348 The point mutation vectors were constructed with the Fast Mutagenesis System (Transgene, Beijing,  
349 China). The QuikChange PCR method using pfu DNA polymerase was performed to generate the  
350 D346H mutant and A351P mutant. The recombinant plasmid (pET28a-CoAT-CPB6) was used as  
351 template DNA, and complementary mutagenic oligonucleotides as primers are shown in Table 1.  
352 After PCR amplification, the mixture was digested with restriction enzymes using *DpnI* to remove  
353 methylated template DNA and then sequenced (TsingKe, Chengdu, China) to verify site  
354 mutagenesis before being transformed into *E. coli* BL21 (DE3) (Transgene, Beijing, China). After  
355 purification, the enzymatic activities for butyryl-CoA and caproyl-CoA were measured following  
356 the method described above for the wild type.

357

#### 358 **Supplemental material**

359 Supplemental material is available online only.

360

#### 361 **Acknowledgements**

362 This work was supported by the Natural Science Foundation of China (31770090), the Open-  
363 foundation project of CAS Key Laboratory of Environmental and Applied Microbiology (KLCAS-  
364 2017-01). Additionally, we would like to thank Dr. Su Dan for her advice and assistance in this  
365 study.

366

#### 367 **Conflict of interest**

368 The authors are aware of no conflict of interest.

369



370 **References**

- 371 1. Kenealy, W. R., Cao, Y., Weimer, P. J. . (1995) Production of caproic acid by cocultures of  
372 ruminal cellulolytic bacteria and *Clostridium kluyveri* grown on cellulose and ethanol.  
373 *Applied Microbiology & Biotechnology* **44**, 507-513
- 374 2. Desbois, A. P. (2012) Potential applications of antimicrobial fatty acids in medicine,  
375 agriculture and other industries. *Recent patents on anti-infective drug discovery* **7**, 111-122
- 376 3. Herman, N. A., Li, J., Bedi, R., Turchi, B., Liu, X., Miller, M. J., and Zhang, W. (2017)  
377 Development of a High-Efficiency Transformation Method and Implementation of  
378 Rational Metabolic Engineering for the Industrial Butanol Hyperproducer *Clostridium*  
379 *saccharoperbutylacetonicum* Strain N1-4. *Appl Environ Microbiol* **83**, 02942-02916
- 380 4. Liu, B., Kleinstuber, S., Centler, F., Harms, H., and Strauber, H. (2020) Competition  
381 Between Butyrate Fermenters and Chain-Elongating Bacteria Limits the Efficiency of  
382 Medium-Chain Carboxylate Production. *Front Microbiol* **11**, 1-13
- 383 5. Marounek M , F. K., Bartos S (1989) Metabolism and Some Characteristics of Ruminal  
384 Strains of *Megasphaera elsdenii*. *Appl Environ Microbiol* **55**, 1570-1573
- 385 6. Zhu, X., Tao, Y., Liang, C., Li, X., Wei, N., Zhang, W., Zhou, Y., Yang, Y., and Bo, T. (2015)  
386 The synthesis of n-caproate from lactate: a new efficient process for medium-chain  
387 carboxylates production. *Sci Rep* **5**, 14360-14369
- 388 7. Kucek L A , Nguyen M , and T, A. L. (2016) Conversion of L-lactate into n-caproate by a  
389 continuously fed reactor microbiome. *Water Research* **93**, 163-171
- 390 8. Wang, Y., Li, B., Dong, H., Huang, X., Chen, R., Chen, X., Yang, L., Peng, B., Xie, G.,  
391 Cheng, W., Hao, B., Li, C., Xia, J., and Zhang, B. (2018) Complete Genome Sequence of  
392 *Clostridium kluyveri* JZZ Applied in Chinese Strong-Flavor Liquor Production. *Curr*  
393 *Microbiol* **75**, 1429-1433
- 394 9. Angenent, L. T., Richter, H., Buckel, W., Spirito, C. M., Steinbusch, K. J., Plugge, C. M.,

- 395 Strik, D. P., Grootsholten, T. I., Buisman, C. J., and Hamelers, H. V. (2016) Chain  
396 Elongation with Reactor Microbiomes: Open-Culture Biotechnology To Produce  
397 Biochemicals. *Environ Sci Technol* **50**, 2796-2810
- 398 10. Spirito, C. M., Richter, H., Rabaey, K., Stams, A. J., and Angenent, L. T. (2014) Chain  
399 elongation in anaerobic reactor microbiomes to recover resources from waste. *Curr Opin*  
400 *Biotechnol* **27**, 115-122
- 401 11. San-Valero, P., Abubakar, H. N., Veiga, M. C., and Kennes, C. (2020) Effect of pH, yeast  
402 extract and inorganic carbon on chain elongation for hexanoic acid production. *Bioresour*  
403 *Technol* **300**, 1-7
- 404 12. Scarborough, M. J., Myers, K. S., Donohue, T. J., and Noguera, D. R. (2020) Medium-  
405 Chain Fatty Acid Synthesis by "Candidatus Weimeria bifida" gen. nov., sp. nov., and  
406 "Candidatus Pseudoramibacter fermentans" sp. nov. *Appl Environ Microbiol* **86**, 1-19
- 407 13. Duncan, S. H., Barcenilla, A., Stewart, C. S., Pryde, S. E., and Flint, H. J. (2002) Acetate  
408 utilization and butyryl coenzyme A (CoA):acetate-CoA transferase in butyrate-producing  
409 bacteria from the human large intestine. *Appl Environ Microbiol* **68**, 5186-5190
- 410 14. Louis, P., and Flint, H. J. (2009) Diversity, metabolism and microbial ecology of butyrate-  
411 producing bacteria from the human large intestine. *FEMS Microbiol Lett* **294**, 1-8
- 412 15. Yasuo Yoshida, Mitsunari Sato, Keiji Nagano, and Hasegawa, Y. (2015) Production of 4-  
413 hydroxybutyrate from succinate semialdehyde in butyrate biosynthesis in *Porphyromonas*  
414 *gingivalis*. *Biochimica Et Biophysica Acta General Subjects* **1850**, 2582-2591
- 415 16. Sato, M., Yoshida, Y., Nagano, K., Hasegawa, Y., Takebe, J., and Yoshimura, F. (2016)  
416 Three CoA Transferases Involved in the Production of Short Chain Fatty Acids in  
417 *Porphyromonas gingivalis*. *Front Microbiol* **7**, 1-13
- 418 17. Henning Seedorf, W. Florian Fricke, Birgit Veith, Holger Brüggemann, H. L., Axel  
419 Strittmatter, Marcus Miethke, Wolfgang Buckel, Julia Hinderberger, Fuli Li, Christoph

- 420 Hagemeyer, Rudolf K. Thauer, and Gottschalk, G. (2008) The genome of *Clostridium*  
421 *kluveri*, a strict anaerobe with unique metabolic features. *PNAS* **105**, 2128–2133
- 422 18. Heider, J. (2001) A new family of CoA-transferases. *FEBS* **509**, 345-349
- 423 19. Charrier, C., Duncan, G. J., Reid, M. D., Rucklidge, G. J., Henderson, D., Young, P.,  
424 Russell, V. J., Aminov, R. I., Flint, H. J., and Louis, P. (2006) A novel class of CoA-  
425 transferase involved in short-chain fatty acid metabolism in butyrate-producing human  
426 colonic bacteria. *Microbiology* **152**, 179-185
- 427 20. Uwe Jacob, Matthias Mack, Tim Clausen, Robert Huber, Wolfgang Buckel, and  
428 Messerschmidt, A. (1996) Glutaconate CoA-transferase from *Acidaminococcus*  
429 *fermentans* the crystal structure reveals homology with other CoA-transferases. *Structure*,  
430 415-426
- 431 21. Zhu, X., Zhou, Y., Wang, Y., Wu, T., Li, X., Li, D., and Tao, Y. (2017) Production of high-  
432 concentration n-caproic acid from lactate through fermentation using a newly isolated  
433 Ruminococcaceae bacterium CPB6. *Biotechnol Biofuels* **10**, 102-114
- 434 22. Wang, H., Li, X., Wang, Y., Tao, Y., Lu, S., Zhu, X., and Li, D. (2018) Improvement of n-  
435 caproic acid production with Ruminococcaceae bacterium CPB6: selection of electron  
436 acceptors and carbon sources and optimization of the culture medium. *Microb Cell Fact*  
437 **17**, 99-108
- 438 23. Yong Tao, Xiaoyu Zhu, Han Wang, Yi Wang, Xiangzhen Li, Hong Jin, and Rui, J. (2017)  
439 Complete genome sequence of Ruminococcaceae bacterium CPB6: A newly isolated  
440 culture for efficient n-caproic acid production from lactate. *Journal of Biotechnology* **259**,  
441 91-94
- 442 24. Hu Xiaohong, Zhou Yan, Tao Yong, Zhu Xiaoyu, Liang Cheng, He Xiaohong, and Ping, G.  
443 (2016) Identification and Characterization of *Clostridium* BEY8 to Produce Butyrate from  
444 Lactate. *Journal of Sichuan University* **53**, 459-464

- 445 25. Scherf U, and W, B. (1991) Purification and properties of 4-hydroxybutyrate coenzyme A  
446 transferase from *Clostridium aminobutyricum*. *Appl Environ Microbiol* **57**, 2699-2702
- 447 26. González-Cabaleiro, R., Lema, J. M., Rodríguez, J., and Kleerebezem, R. (2013) Linking  
448 thermodynamics and kinetics to assess pathway reversibility in anaerobic bioprocesses.  
449 *Energy & Environmental Science* **6**, 3780-3789
- 450 27. D P Wiesenborn, F B Rudolph, and Papoutsakis, E. T. (1989) Coenzyme A Transferase  
451 from *Clostridium acetobutylicum* ATCC 824 and Its Role in the Uptake of Acids. *Appl*  
452 *Environ Microbiol* **55**, 323-329
- 453 28. Lee, J., Jang, Y. S., Han, M. J., Kim, J. Y., and Lee, S. Y. (2016) Deciphering *Clostridium*  
454 *tyrobutyricum* Metabolism Based on the Whole-Genome Sequence and Proteome Analyses.  
455 *mBio* **7**, 1-12
- 456 29. Louis, P., Young, P., Holtrop, G., and Flint, H. J. (2010) Diversity of human colonic  
457 butyrate-producing bacteria revealed by analysis of the butyryl-CoA:acetate CoA-  
458 transferase gene. *Environ Microbiol* **12**, 304-314
- 459 30. Li, T. B., Zhao, F. J., Liu, Z., Jin, Y., Liu, Y., Pei, X. Q., Zhang, Z. G., Wang, G., and Wu,  
460 Z. L. (2019) Structure-guided engineering of ChKRED20 from *Chryseobacterium* sp.  
461 CA49 for asymmetric reduction of aryl ketoesters. *Enzyme Microb Technol* **125**, 29-36
- 462 31. Makabe, K., Hirota, R., Shiono, Y., Tanaka, Y., and Koseki, T. (2020) Biochemical and  
463 structural investigation of rutinoidase from *Aspergillus oryzae*. *Appl Environ Microbiol*
- 464 32. Bilen, M., Mbogning, M. D., Cadoret, F., Dubourg, G., Daoud, Z., Fournier, P. E., and  
465 Raoult, D. (2017) '*Pygmaibacter massiliensis*' sp. nov., a new bacterium isolated from the  
466 human gut of a Pygmy woman. *New Microbes New Infect* **16**, 37-38
- 467 33. Sitkin, S., and Pokrotnieks, J. (2019) Clinical Potential of Anti-inflammatory Effects of  
468 *Faecalibacterium prausnitzii* and Butyrate in Inflammatory Bowel Disease. *Inflamm Bowel*  
469 *Dis* **25**, e40-e41

- 470 34. Lee, N. R., Lee, C. H., Lee, D. Y., and Park, J. B. (2020) Genome-Scale Metabolic Network  
471 Reconstruction and In Silico Analysis of Hexanoic acid Producing *Megasphaera elsdenii*.  
472 *Microorganisms* **8**
- 473 35. Zoraghi, R., See, R. H., Gong, H., Lian, T., Swayze, R., Finlay, B. B., Brunham, R. C.,  
474 McMaster, W. R., and Reiner, N. E. (2010) Functional analysis, overexpression, and kinetic  
475 characterization of pyruvate kinase from methicillin-resistant *Staphylococcus aureus*.  
476 *Biochemistry* **49**, 7733-7747
- 477 36. Stephanie D. Tammam, Jean-Christophe Rochet, and Fraser, M. E. (2007) Identification of  
478 the Cysteine Residue Exposed by the Conformational Change in Pig Heart Succinyl-  
479 CoA:3-Ketoacid Coenzyme A Transferase on Binding Coenzyme A. *Biochemistry* **46**,  
480 10852-10863
- 481 37. Macieira, S., Zhang, J., Velarde, M., Buckel, W., and Messerschmidt, A. (2009) Crystal  
482 structure of 4-hydroxybutyrate CoA-transferase from *Clostridium aminobutyricum*. *Biol*  
483 *Chem* **390**, 1251-1263
- 484 38. Thorsten Selmer, Angela Willanzheimer, and Hetzel, M. (2002) Propionate CoA-  
485 transferase from *Clostridium propionicum*: Cloning of the gene and identification of  
486 glutamate 324 at the active site. *Eur. J. Biochem.* **269**, 372-380
- 487 39. Cao, J., Dang, G., Li, H., Li, T., Yue, Z., Li, N., Liu, Y., Liu, S., and Chen, L. (2015)  
488 Identification and Characterization of Lipase Activity and Immunogenicity of LipL from  
489 *Mycobacterium tuberculosis*. *PLoS One* **10**, e0138151
- 490 40. Park, S. H., Kim, S. J., Park, S., and Kim, H. K. (2019) Characterization of Organic  
491 Solvent-Tolerant Lipolytic Enzyme from *Marinobacter lipolyticus* Isolated from the  
492 Antarctic Ocean. *Appl Biochem Biotechnol* **187**, 1046-1060
- 493 41. Lindenkamp, N., Schurmann, M., and Steinbuchel, A. (2013) A propionate CoA-  
494 transferase of *Ralstonia eutropha* H16 with broad substrate specificity catalyzing the CoA

- 495 thioester formation of various carboxylic acids. *Appl Microbiol Biotechnol* **97**, 7699-7709
- 496 42. Bloess, S., Beuel, T., Kruger, T., Sewald, N., Dierks, T., and Fischer von Mollard, G. (2019)
- 497 Expression, characterization, and site-specific covalent immobilization of an L-amino acid
- 498 oxidase from the fungus *Hebeloma cylindrosporum*. *Appl Microbiol Biotechnol* **103**, 2229-
- 499 2241
- 500 43. Buckel W, Dorn U, and R, S. (1981) Glutaconate CoA-Transferase from *Acidaminococcus*
- 501 *fermentans*. *Eur. J. Biochem.* **118**, 315–321
- 502 44. Cuff, J. A., and Barton, G. J. (2000) Application of multiple sequence alignment profiles
- 503 to improve protein secondary structure prediction. *Proteins* **40**, 502-511
- 504 45. Dowd, S. E., Callaway, T. R., Wolcott, R. D., Sun, Y., McKeehan, T., Hagevoort, R. G.,
- 505 and Edrington, T. S. (2008) Evaluation of the bacterial diversity in the feces of cattle using
- 506 16S rDNA bacterial tag-encoded FLX amplicon pyrosequencing (bTEFAP). *BMC*
- 507 *Microbiol* **8**, 1-8
- 508 46. Bajaj, J. S., Ridlon, J. M., Hylemon, P. B., Thacker, L. R., Heuman, D. M., Smith, S.,
- 509 Sikaroodi, M., and Gillevet, P. M. (2012) Linkage of gut microbiome with cognition in
- 510 hepatic encephalopathy. *Am J Physiol Gastrointest Liver Physiol* **302**, G168-175
- 511 47. Kant, R., Rasinkangas, P., Satokari, R., Pietila, T. E., and Palva, A. (2015) Genome
- 512 Sequence of the Butyrate-Producing Anaerobic Bacterium *Anaerostipes hadrus* PEL 85.
- 513 *Genome Announc* **3**, 1-2
- 514 48. Tamura, K., Peterson, D., Peterson, N., Stecher, G., Nei, M., and Kumar, S. (2011) MEGA5:
- 515 molecular evolutionary genetics analysis using maximum likelihood, evolutionary distance,
- 516 and maximum parsimony methods. *Mol Biol Evol* **28**, 2731-2739
- 517 49. Arnold, K., Bordoli, L., Kopp, J., and Schwede, T. (2006) The SWISS-MODEL workspace:
- 518 a web-based environment for protein structure homology modelling. *Bioinformatics* **22**,
- 519 195-201

- 520 50. Marchler-Bauer, A., Anderson, J. B., Chitsaz, F., Derbyshire, M. K., DeWeese-Scott, C.,  
521 Fong, J. H., Geer, L. Y., Geer, R. C., Gonzales, N. R., Gwadz, M., He, S., Hurwitz, D. I.,  
522 Jackson, J. D., Ke, Z., Lanczycki, C. J., Liebert, C. A., Liu, C., Lu, F., Lu, S., Marchler, G.  
523 H., Mullokandov, M., Song, J. S., Tasneem, A., Thanki, N., Yamashita, R. A., Zhang, D.,  
524 Zhang, N., and Bryant, S. H. (2009) CDD: specific functional annotation with the  
525 Conserved Domain Database. *Nucleic Acids Res* **37**, D205-210
- 526 51. Emms, D. M., and Kelly, S. (2015) OrthoFinder: solving fundamental biases in whole  
527 genome comparisons dramatically improves orthogroup inference accuracy. *Genome Biol*  
528 **16**, 1-14
- 529 52. Edgar, R. C. (2004) MUSCLE: multiple sequence alignment with high accuracy and high  
530 throughput. *Nucleic Acids Res* **32**, 1792-1797
- 531 53. Stamatakis, A. (2014) RAxML version 8: a tool for phylogenetic analysis and post-analysis  
532 of large phylogenies. *Bioinformatics* **30**, 1312-1313
- 533
- 534

535 **Tables**

536 **Table 1. Bacterial strains, plasmids, and primers used in this study.**

|                             | Description                                                                    | Reference or source |
|-----------------------------|--------------------------------------------------------------------------------|---------------------|
| <b>Strains</b>              |                                                                                |                     |
| CPB6                        | <i>Ruminococcaceae</i> bacterium CPB6                                          | Zhu XY et al.(21)   |
| BEY8                        | <i>Clostridium tyrobutyricum</i> BEY8                                          | Hu XH et al.(24)    |
| <i>E. coli</i> DH5 $\alpha$ | TreliefTtMm 5 $\alpha$ Chemically Competent Cell                               | TsingKe             |
| <i>E. coli</i> BL21 (DE3)   | Expression Chemically Competent Cell                                           | Transgene           |
| <b>Plasmids</b>             |                                                                                |                     |
| pET28a                      | <i>E. coli</i> expression vector (Kan, T7 promoter)                            | This study          |
| pET28a-CoAT-CPB6            | pET28a carrying gene CoAT from CPB6 fused with His tag in N-terminus           | This study          |
| pET28a-CoAT-BEY8            | pET28a carrying gene CoAT from BEY8 fused with His tag in N-terminus           | This study          |
| D346H-mutant                | The 346 aa Asp mutation of CoAT in pET28a-CoAT-CPB6                            | This study          |
| A351P-mutant                | The 351 aa Ala mutation of CoAT in pET28a-CoAT-CPB6                            | This study          |
| <b>Primers</b>              |                                                                                |                     |
|                             | Sequence (5'-3')                                                               |                     |
| YT43-Sall-fw                | TAATACGACTCACTATAGGG                                                           | This study          |
| YT44-NotI-rv                | GCTAGTTATTGCTCAGCGG                                                            | This study          |
| YT50-CPB6-fw <sup>a</sup>   | <u>GTGGTGCTCGAGTGC</u> ATGAGTTTCAAGAAGAATATGCACAAA<br>AACTGAC                  | This study          |
| YT51-CPB6-rv <sup>a</sup>   | <u>CGAATTCGAGCTCCG</u> TAAATTTTATTGCTTCTGCGCCAGATGC                            | This study          |
| YT52-BEY8-fw <sup>a</sup>   | <u>CGAATTCGAGCTCCGTCGAC</u> ATGAGTTTGGAGGAATTGTATAAG<br>AGTAAAGTTGTTAGT        | This study          |
| YT53-BEY8-rv <sup>a</sup>   | <u>GTGGTGCTCGAGTGC</u> GGCCGCTTTTATAAGTTCTCTAGCTCTTT<br>GTTTTAATGTCTTACCTCTAAG | This study          |
| YT60-A351P-fw <sup>b</sup>  | AGCTGGATTTTGTCTGGGT <b>CC</b> CTATCTGAGCCACGGT                                 | This study          |
| YT61-A351P-rv <sup>b</sup>  | <b>G</b> ACCCAGAACAAAATCCAGCTGACCGGCAC                                         | This study          |
| YT62-D346H-fw <sup>b</sup>  | AGCGGTGCCGGTGGT <b>C</b> AGCTGCATTTTGTCT                                       | This study          |
| YT63-D346H-rv <sup>b</sup>  | <b>G</b> CAGCTGACCACCGGCACCGCTAATCTGACGAAA                                     | This study          |

537 <sup>a</sup>Underscored letters match the sequence of vectors for seamless cloning.

538 <sup>b</sup>The sequences corresponding to the mutated codons are written in bold.

539



540 **Table 2. Purification and specific activities of the CoATs<sup>a</sup>**

| Enzyme                        | Total protein, mg | Total activity, U | Specific activity, U/mg of protein |                 | Purification fold |
|-------------------------------|-------------------|-------------------|------------------------------------|-----------------|-------------------|
|                               |                   |                   | Butyryl-CoA                        | Caproyl-CoA     |                   |
| The CPB6-CoAT                 |                   |                   |                                    |                 |                   |
| Crude extract                 | 87.04             | 180.2             | 2.07±0.06                          | 5.11±0.08       | 1                 |
| Purified protein <sup>b</sup> | 22.61             | 244.2             | 10.8±0.02                          | 27.6±0.15       | 5.4               |
| The BEY8-CoAT                 |                   |                   |                                    |                 |                   |
| Crude extract                 | 63.10             | 436.0             | 6.91±0.12                          | ND <sup>a</sup> | 1                 |
| Purified protein <sup>b</sup> | 17.66             | 462.7             | 26.2±0.09                          | ND <sup>a</sup> | 3.8               |

541 <sup>a</sup>The purification data in the table were from 300 ml of culture medium. U =  $\mu\text{mol}/\text{min}$ . ND = not detectable.

542 <sup>b</sup>Protein was purified with affinity chromatography.

543

544 **Table 3. Kinetic parameters for the CoATs.**

| Enzyme                       | Butyryl-CoA                |                                    |                                                      |                                     | Caproyl-CoA                |                                    |                                                      |                                     | Reference                         |
|------------------------------|----------------------------|------------------------------------|------------------------------------------------------|-------------------------------------|----------------------------|------------------------------------|------------------------------------------------------|-------------------------------------|-----------------------------------|
|                              | $K_m$<br>( $\mu\text{M}$ ) | $k_{cat}$<br>( $\text{min}^{-1}$ ) | $k_{cat}/K_m$<br>( $\text{mM}^{-1}\text{min}^{-1}$ ) | $V_m$<br>( $\mu\text{M min}^{-1}$ ) | $K_m$<br>( $\mu\text{M}$ ) | $k_{cat}$<br>( $\text{min}^{-1}$ ) | $k_{cat}/K_m$<br>( $\text{mM}^{-1}\text{min}^{-1}$ ) | $V_m$<br>( $\mu\text{M min}^{-1}$ ) |                                   |
| BEY8-CoAT                    | 369.5                      | 13.91                              | 37.65                                                | 27.81                               | ND <sup>c</sup>            | ND <sup>c</sup>                    | ND <sup>c</sup>                                      | ND <sup>c</sup>                     | This study                        |
| CPB6-CoAT                    | 536.9                      | 5.810                              | 10.82                                                | 11.62                               | 358.8                      | 14.74                              | 41.08                                                | 29.51                               | This study                        |
| CPB6-CoAT-D346H-mutant       | 747.4                      | 1.296                              | 1.734                                                | 2.592                               | 747.8                      | 4.235                              | 5.663                                                | 8.469                               | This study                        |
| CPB6-CoAT-A351P-mutant       | 622.7                      | 2.987                              | 4.797                                                | 5.975                               | 532.1                      | 6.784                              | 12.75                                                | 13.57                               | This study                        |
| PGN_0725 <sup>a</sup>        | 520.0                      | 9.33                               | 17.95                                                | 71.51                               | NR <sup>c</sup>            | NR <sup>c</sup>                    | NR <sup>c</sup>                                      | NR <sup>c</sup>                     | Sato, Yoshida et al.<br>2016 (16) |
| CoA transferase <sup>b</sup> | 21.01                      | NR <sup>c</sup>                    | NR <sup>c</sup>                                      | NR <sup>c</sup>                     | NR <sup>c</sup>            | NR <sup>c</sup>                    | NR <sup>c</sup>                                      | NR <sup>c</sup>                     | Papoutsakis. 1989 (27)            |

545 <sup>a</sup> Butyryl-CoA:acetate CoA transferase from *Porphyromonas gingivalis*.

546 <sup>b</sup> Butyryl-CoA:acetate CoA transferase from *Clostridium acetobutylicum* ATCC 824.

547 <sup>c</sup> ND is defined as not determined; NR, not reported.

548

549 **Table 4. Prediction of the active sites of CoATs in different strains.**

| Strain                                                 | Location of active site | Sequence of active site |
|--------------------------------------------------------|-------------------------|-------------------------|
| <i>Ruminococcaceae</i> bacterium CPB6 (ARP50528.1)     | 342-353                 | GGQLDFVLGAYL            |
| <i>Clostridium kluyveri</i> (APM41307.1)               | 335-346                 | GGQVDFIRGANL            |
| <i>Megasphaera elsdenii</i> (WP_036202574.1)           | 356-367                 | ADSYTYKKAPTL            |
| <i>Clostridium tyrobutyricum</i> BEY8 (WP_017752740.1) | 335-346                 | GGQIDFTRGASM            |
| <i>Lachnospiraceae</i> bacterium (HCI66479.1)          | 340-351                 | GGQLDFVLGAYK            |
| <i>Anaerostipeshadrus</i> (WP_044923342.1)             | 342-353                 | GGQLDFVMGAYL            |

550

551

552 **Figure captions**

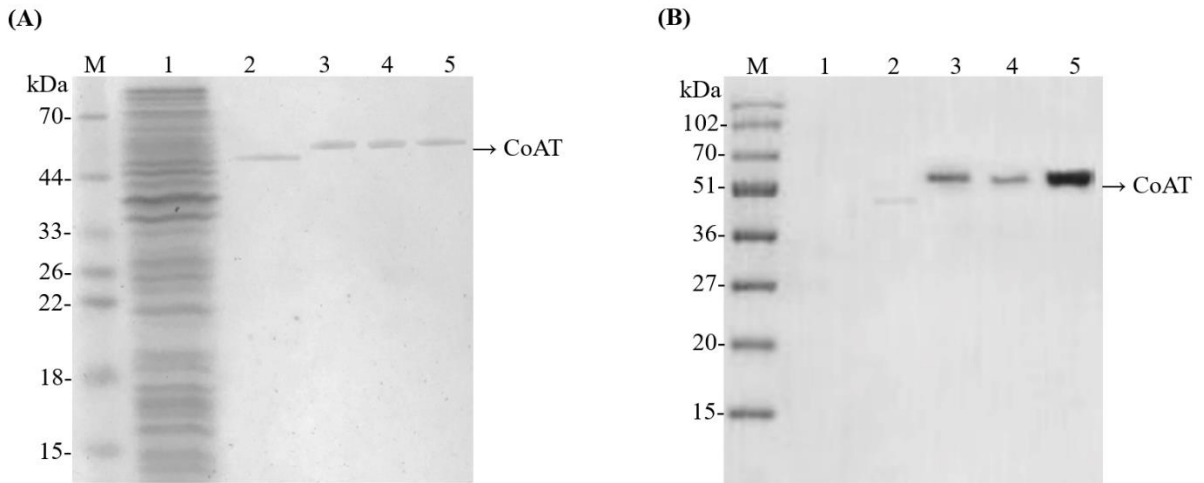

553

554 **FIGURE 1. Purification and western blot analysis of CPB6-CoAT (CCoAT) and BEY8-CoAT**

555 **(BCoAT).** Analysis of the purified CCoAT and BCoAT by SDS-PAGE **(A)**. Analysis of the purified

556 CCoAT and BCoAT by western blotting with anti-His-tag antibody **(B)**. M, molecular mass marker.

557 Lanes: 1, pET28a; 2, BCoAT; 3, CCoAT; 4, CCoAT-D346H mutant; 5, CCoAT-A351P mutant.

558 Samples (~2  $\mu$ g) were visualized by Coomassie Brilliant Blue staining after electrophoresis.

559 Molecular mass positions are shown by markers (kDa).

560

561

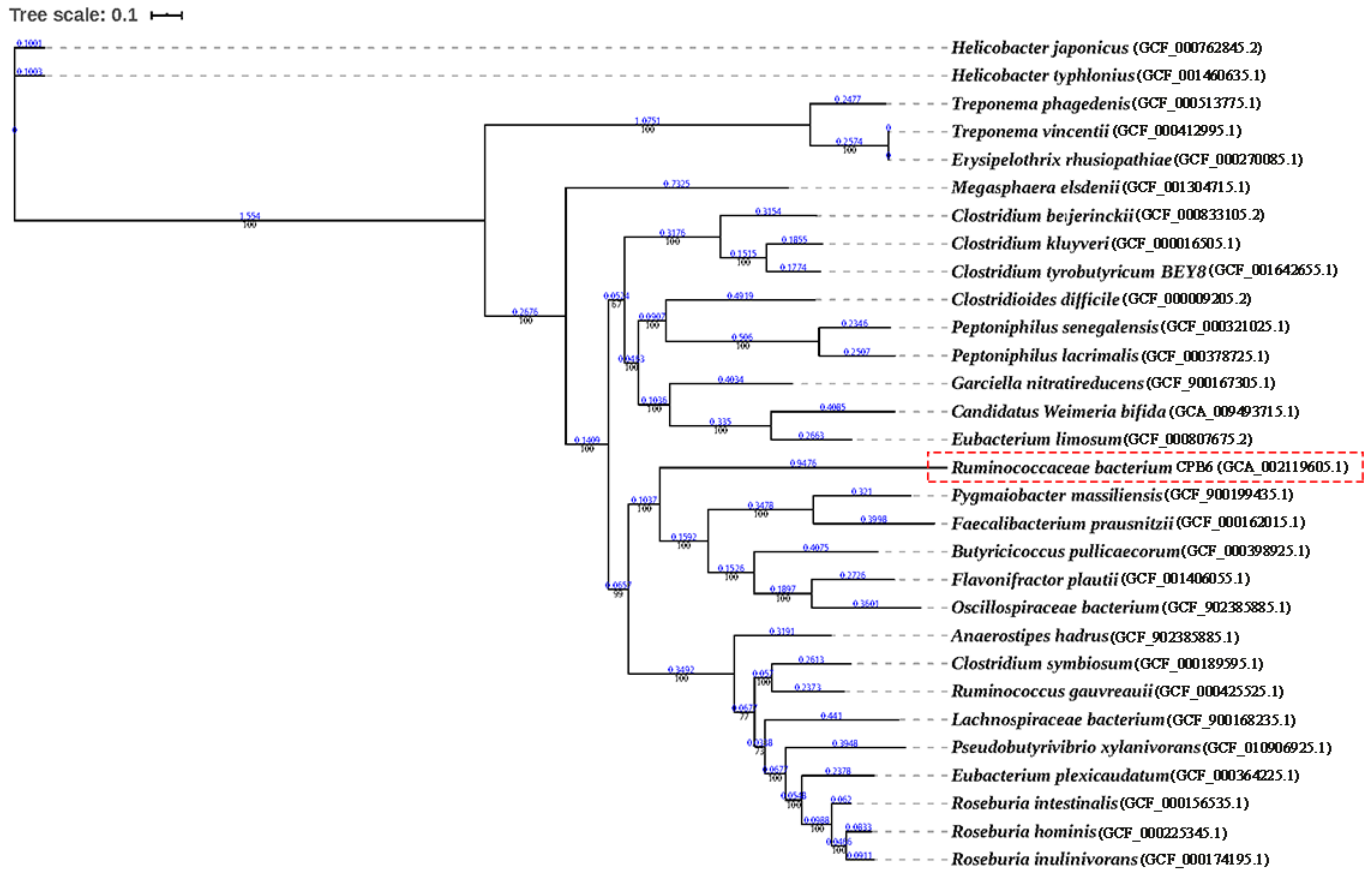

562 **FIGURE 2. Phylogenetic tree of the whole genomes of 29 strains containing the CoA-**  
563 **transferase.** Numbers at the nodes indicate the levels of bootstrap values. The scale bar for the tree  
564 represents a distance of 0.1 substitutions per site.

565

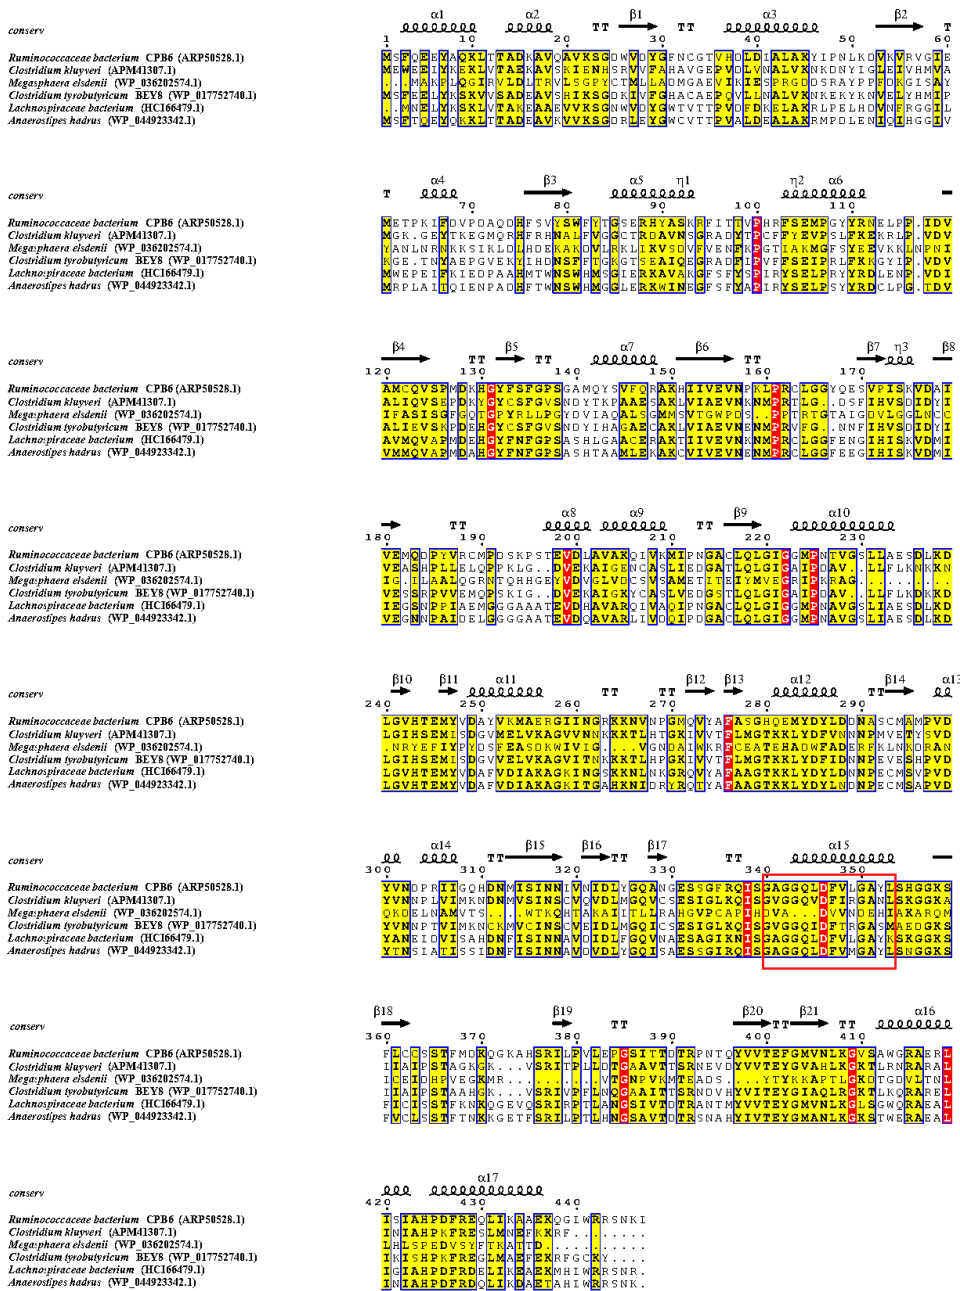

566

567 **FIGURE 3. Multiple amino acid sequence alignment for CoATs.** There were 17  $\alpha$ -helices and  
 568 21  $\beta$ -pleated sheets, which are represented with symbols. Nonconserved, 60% conserved, and 100%  
 569 conserved residues are marked with white, yellow, and red font, respectively. Conserved motifs are  
 570 boxed with a red frame.

571

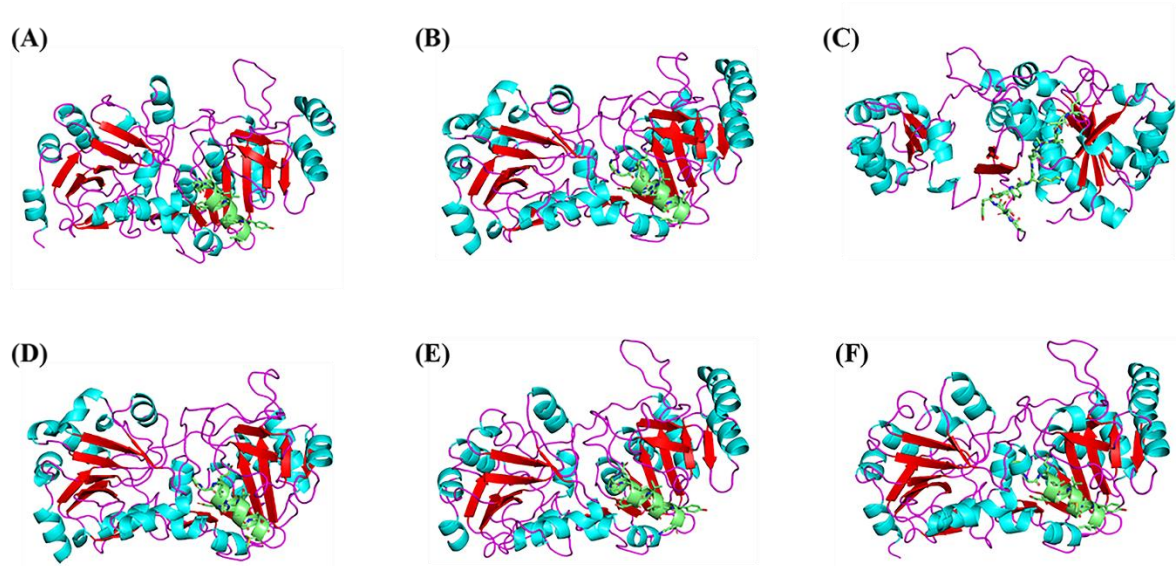

572

573 **FIGURE 4. Predicted 3D structures of representative CoAT proteins.** 3D structures of CoATs  
574 from *Ruminococcaceae* bacterium CPB6 (A), *Clostridium kluyveri* (B), *Megasphaera elsdenii* (C),  
575 *Clostridium tyrobutyricum* BEY8 (D), *Lachnospiraceae* bacterium (E), and *Anaerostipes hadrus*  
576 (F). Helices of the catalytic domains,  $\beta$ -pleated sheets, loop regions, and active centers are colored  
577 sky blue, red, purple, and green, respectively.

578

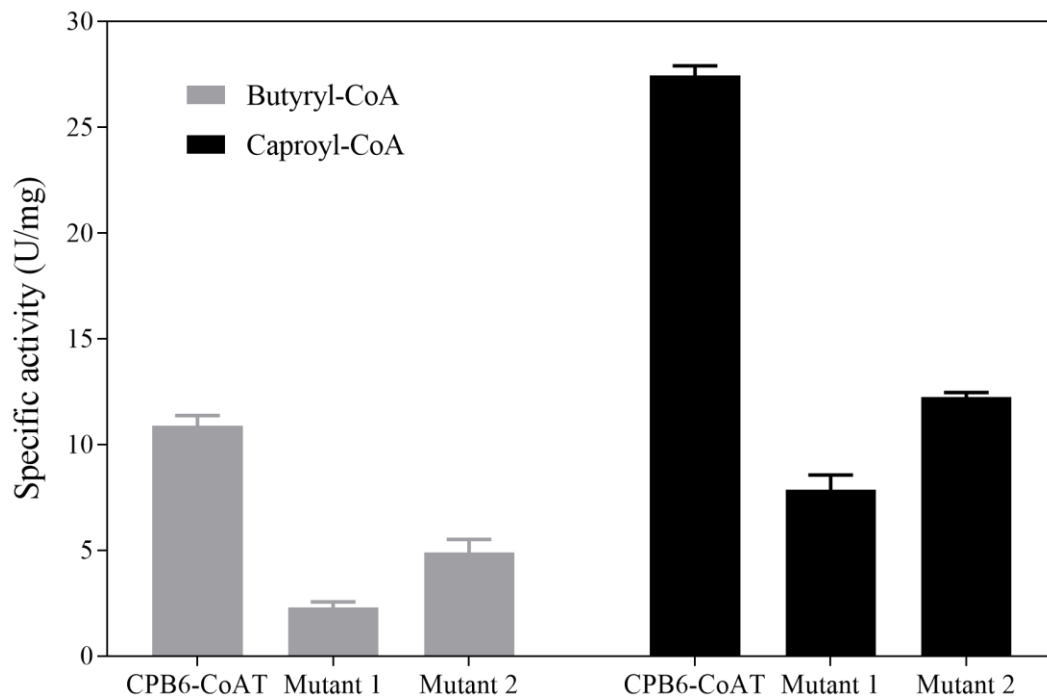

579

580 **FIGURE 5. Comparison of CoA-transferase activities** (Mutant 1, D346H-mutant; Mutant 2,  
581 A351P-mutant). The specific activity with butyryl-CoA as the substrate is labeled in light gray, and  
582 the specific activity with caproyl-CoA as the substrate is marked in dark gray. The values represent  
583 the means  $\pm$  SDs of three independent experiments.
